# Supplementary material for: HiSpike: A high-throughput cost effective sequencing method for the SARS-CoV-2 spike gene
Source: Research Square preprint supplement (doi:10.21203/rs.3.rs-333890/v1), 2021-03-29
Supplement: Supplementary file 1 [file b8bdcf4158f3fbb65cd35e17.xlsx]

## Sheet: flow cell distribution
INDEX	BIOSAMPLE	INDEX 1 (I7)	INDEX 2 (I5)	% READS IDENTIFIED (PF)
1	A1	TGGATGTC	GGAGTTAG	1.0067
2	A2	TGGATGTC	CCTCAATC	1.4066
3	A3	TGGATGTC	TTCTGGCT	1.4711
4	A4	TGGATGTC	AAGACCGA	1.2246
5	A5	TGGATGTC	TGTCCACG	1.2617
6	A6	TGGATGTC	ACAGGTGC	0.7488
7	A7	TGGATGTC	GTGAACAT	1.2324
8	A8	TGGATGTC	CACTTGTA	1.1529
9	A9	TGGATGTC	TGCAGCAT	1.5391
10	A10	TGGATGTC	ACGTCGTA	1.2774
11	A11	TGGATGTC	GTAATACG	0.5173
12	A12	TGGATGTC	TTACTGTA	0.4409
13	B1	CAAGAACT	GGAGTTAG	0.8301
14	B2	CAAGAACT	CCTCAATC	1.419
15	B3	CAAGAACT	TTCTGGCT	1.487
16	B4	CAAGAACT	AAGACCGA	1.3978
17	B5	CAAGAACT	TGTCCACG	1.2442
18	B6	CAAGAACT	ACAGGTGC	0.7847
19	B7	CAAGAACT	GTGAACAT	1.0787
20	B8	CAAGAACT	CACTTGTA	0.9891
21	B9	CAAGAACT	TGCAGCAT	1.3758
22	B10	CAAGAACT	ACGTCGTA	1.3901
23	B11	CAAGAACT	GTAATACG	0.9248
24	B12	CAAGAACT	TTACTGTA	0.7658
25	C1	GTTCGTGA	GGAGTTAG	0.9139
26	C2	GTTCGTGA	CCTCAATC	0.8871
27	C3	GTTCGTGA	TTCTGGCT	1.3773
28	C4	GTTCGTGA	AAGACCGA	0.669
29	C5	GTTCGTGA	TGTCCACG	0.8473
30	C6	GTTCGTGA	ACAGGTGC	0.8864
31	C7	GTTCGTGA	GTGAACAT	0.8763
32	C8	GTTCGTGA	CACTTGTA	0.8496
33	C9	GTTCGTGA	TGCAGCAT	1.0303
34	C10	GTTCGTGA	ACGTCGTA	0.9793
35	C11	GTTCGTGA	GTAATACG	0.6904
36	C12	GTTCGTGA	TTACTGTA	0.446
37	D1	ATGCGGTT	GGAGTTAG	0.728
38	D2	ATGCGGTT	CCTCAATC	0.9758
39	D3	ATGCGGTT	TTCTGGCT	1.0963
40	D4	ATGCGGTT	AAGACCGA	0.7153
41	D5	ATGCGGTT	TGTCCACG	0.602
42	D6	ATGCGGTT	ACAGGTGC	0.786
43	D7	ATGCGGTT	GTGAACAT	0.8651
44	D8	ATGCGGTT	CACTTGTA	0.5873
45	D9	ATGCGGTT	TGCAGCAT	0.918
46	D10	ATGCGGTT	ACGTCGTA	0.7047
47	D11	ATGCGGTT	GTAATACG	0.2257
48	D12	ATGCGGTT	TTACTGTA	0.6973
49	E1	TACGCCAA	GGAGTTAG	0.6058
50	E2	TACGCCAA	CCTCAATC	1.089
51	E3	TACGCCAA	TTCTGGCT	0.68
52	E4	TACGCCAA	AAGACCGA	0.6191
53	E5	TACGCCAA	TGTCCACG	0.3155
54	E6	TACGCCAA	ACAGGTGC	0.6589
55	E7	TACGCCAA	GTGAACAT	0.7192
56	E8	TACGCCAA	CACTTGTA	0.7487
57	E9	TACGCCAA	TGCAGCAT	0.61
58	E10	TACGCCAA	ACGTCGTA	0.7335
59	E11	TACGCCAA	GTAATACG	0.502
60	E12	TACGCCAA	TTACTGTA	0.6227
61	F1	GCATAACC	GGAGTTAG	0.7396
62	F2	GCATAACC	CCTCAATC	1.1126
63	F3	GCATAACC	TTCTGGCT	1.2819
64	F4	GCATAACC	AAGACCGA	0.9338
65	F5	GCATAACC	TGTCCACG	0.9169
66	F6	GCATAACC	ACAGGTGC	0.6031
67	F7	GCATAACC	GTGAACAT	0.7055
68	F8	GCATAACC	CACTTGTA	0.9746
69	F9	GCATAACC	TGCAGCAT	1.2377
70	F10	GCATAACC	ACGTCGTA	0.8179
71	F11	GCATAACC	GTAATACG	0.5047
72	F12	GCATAACC	TTACTGTA	0.2445
73	G1	TAATTGGA	GGAGTTAG	0.8295
74	G2	TAATTGGA	CCTCAATC	1.0492
75	G3	TAATTGGA	TTCTGGCT	1.6275
76	G4	TAATTGGA	AAGACCGA	1.2256
77	G5	TAATTGGA	TGTCCACG	0.716
78	G6	TAATTGGA	ACAGGTGC	0.7689
79	G7	TAATTGGA	GTGAACAT	1.1205
80	G8	TAATTGGA	CACTTGTA	1.1211
81	G10	TAATTGGA	ACGTCGTA	0.8978
82	G11	TAATTGGA	GTAATACG	0.6481
83	H1	GCTGGTTC	GGAGTTAG	0.7864
84	H2	GCTGGTTC	CCTCAATC	1.1694
85	H3	GCTGGTTC	TTCTGGCT	0.9906
86	H4	GCTGGTTC	AAGACCGA	0.9075
87	H5	GCTGGTTC	TGTCCACG	0.8802
88	H6	GCTGGTTC	ACAGGTGC	0.6906
89	H7	GCTGGTTC	GTGAACAT	0.8303
90	H8	GCTGGTTC	CACTTGTA	0.862
91	H10	GCTGGTTC	ACGTCGTA	0.8871
92	H11	GCTGGTTC	GTAATACG	0.5987
average				0.901143
